# Supplementary material for: Novel application of electrochemical bipolar exfoliated graphene for highly sensitive disposable label-free cancer biomarker aptasensors
Source: Royal Society of Chemistry journal article supplement (doi:10.1039/d1na00470k), 2021-01-01
Supplement: d1na00470k1.pdf [file d1na00470k1.pdf]

## Supplementary Information

### Novel Application of Bipolar Electrochemical Exfoliated Graphene for Highly Sensitive Disposable Label-Free Cancer Biomarker Aptasensors

Shahrzad Forouzanfar<sup>a</sup>, Iman Khakpour<sup>b</sup>, Fahmida Alam<sup>a</sup>, Nezhil Pala<sup>a</sup>, Chunlei Wang<sup>b,c\*</sup>

<sup>a</sup>*Department of Electrical and Computer Engineering, Florida International University*

<sup>b</sup>*Department of Mechanical and Materials Engineering, Florida International University*

<sup>c</sup>*Center for Study of Matter at Extreme Conditions, Florida International University*

\*Corresponding Author: wangc@fiu.edu

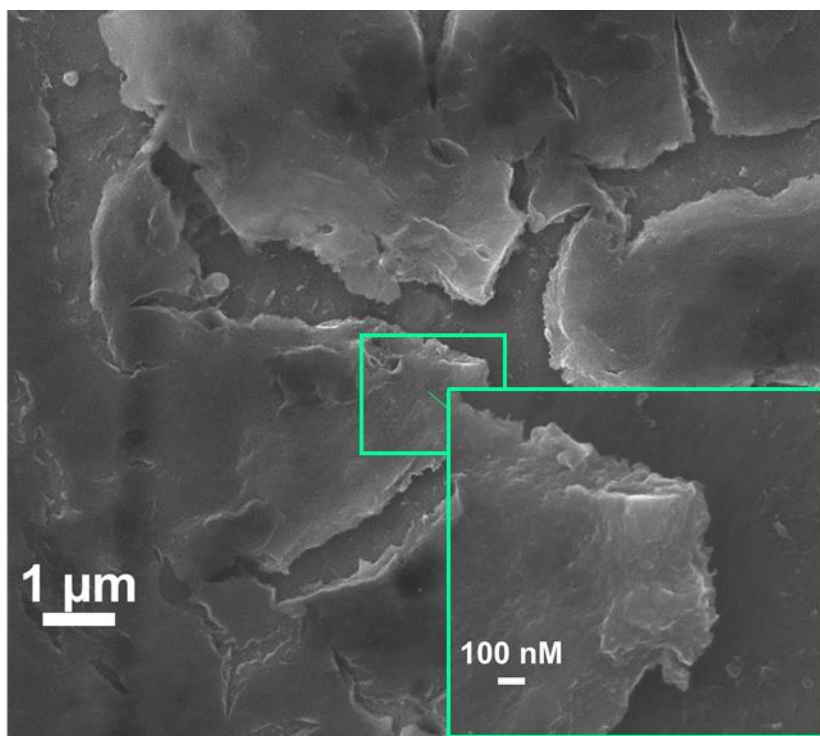

**Figure S1** SEM images of GO deposited on stainless steel electrode (inset image is a magnified image of designated area)

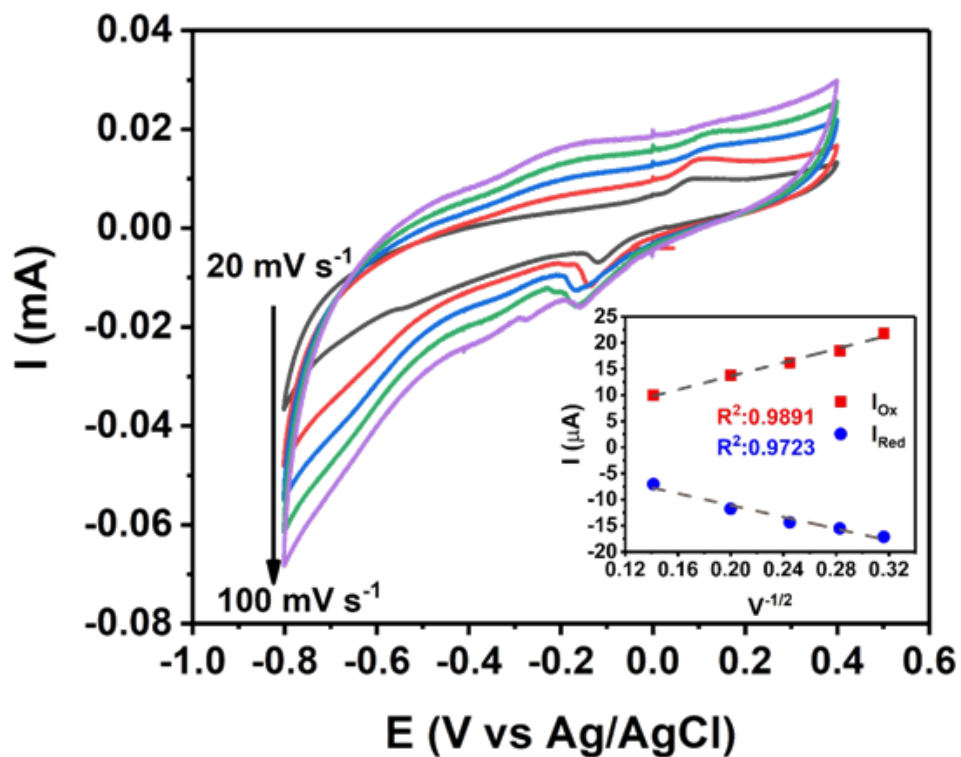

**Figure S2** The CV plots of the SS/GO electrode at different scan rates at the range of 10–100 mV s<sup>-1</sup> and the calibration curves of reduction and oxidation peak current versus the square root of scan rates (inset plots).

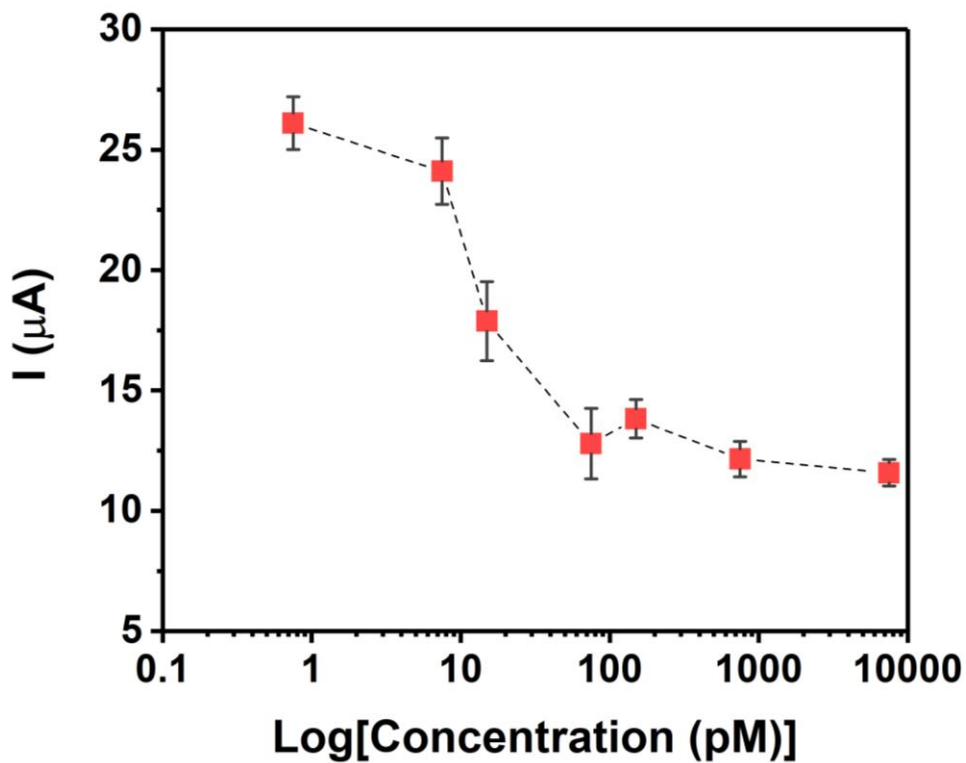

**Figure S3** DPV peak current for SS/GO<sub>Apt</sub> electrode response to PDGF-BB ranging from 0–1 nM.
